# Supplementary material
Source: PubMed Central journal article supplement (PMC7526040)
Supplement: NIHMS1627641-supplement-1.pdf [file NIHMS1627641-supplement-1.pdf]

SUPPLEMENTAL TABLE 1

## Comparison of Cox proportional hazard regression model and deep-learning neural network model for survival

| Features | Outcome                   | Model                                    | Concordance index <sup>a</sup> | Mean absolute error <sup>b</sup> |
|----------|---------------------------|------------------------------------------|--------------------------------|----------------------------------|
| Set 1    | Progression-free survival | Cox proportional hazard regression model | 0.696 ± 0.072                  | 322.2 ± 129.7                    |
|          |                           | CoxBoost                                 | 0.696 ± 0.072                  | 30.2 ± 3.8                       |
|          |                           | CoxLasso                                 | 0.699 ± 0.070                  | 30.4 ± 2.5                       |
|          |                           | Random Survival Forest                   | 0.694 ± 0.073                  | 30.0 ± 4.2                       |
|          |                           | Deep learning                            | 0.695 ± 0.080                  | 29.3 ± 3.4                       |
|          | Overall survival          | Cox proportional hazard regression       | 0.520 ± 0.059                  | 37.2 ± 2.7                       |
|          |                           | CoxBoost                                 | 0.520 ± 0.059                  | 40.9 ± 4.0                       |
|          |                           | CoxLasso                                 | 0.521 ± 0.059                  | 40.8 ± 5.0                       |
|          |                           | Random Survival Forest                   | 0.538 ± 0.051                  | 33.6 ± 4.3                       |
|          |                           | Deep learning                            | 0.538 ± 0.042                  | 30.9 ± 3.7                       |
| Set 2    | Progression-free survival | Cox proportional hazard regression       | 0.785 ± 0.064                  | 329.5 ± 133.4                    |
|          |                           | CoxBoost                                 | 0.785 ± 0.063                  | 28.8 ± 4.1                       |
|          |                           | CoxLasso                                 | 0.785 ± 0.064                  | 29.9 ± 3.8                       |
|          |                           | Random Survival Forest                   | 0.771 ± 0.070                  | 29.8 ± 4.3                       |
|          |                           | Deep learning                            | 0.787 ± 0.063                  | 29.7 ± 3.5                       |
|          | Overall survival          | Cox proportional hazard regression       | 0.511 ± 0.045                  | 37.6 ± 3.0                       |
|          |                           | CoxBoost                                 | 0.511 ± 0.045                  | 39.5 ± 2.8                       |
|          |                           | CoxLasso                                 | 0.512 ± 0.049                  | 38.9 ± 2.5                       |
|          |                           | Random Survival Forest                   | 0.527 ± 0.053                  | 33.6 ± 4.3                       |
|          |                           | Deep learning                            | 0.534 ± 0.051                  | 30.7 ± 3.7                       |

There were 241 events for progression-free survival and 170 events for overall survival events among 768 cases.

<sup>a</sup> A higher concordance index means a better performing model; <sup>b</sup> A lower mean absolute error means better a performing model.

Matsuo et al. Survival outcome prediction in cervical cancer. *Am J Obstet Gynecol* 2019.

SUPPLEMENTAL TABLE 2

## Survival predictors in deep-learning model (features set 1)

| Progression-free survival        |          | Overall survival               |          |
|----------------------------------|----------|--------------------------------|----------|
| Features                         | Pvalue   | Features                       | Pvalue   |
| Albumin <sup>a</sup>             | 1.57E-60 | Diabetes mellitus <sup>a</sup> | 2.35E-04 |
| Hemoglobin <sup>a</sup>          | 3.08E-54 | Hispanic <sup>a</sup>          | 1.39E-03 |
| Heart rate <sup>a</sup>          | 1.35E-31 | White blood cell <sup>a</sup>  | 3.29E-03 |
| Platelet <sup>a</sup>            | 1.06E-22 | Creatinine <sup>a</sup>        | 5.95E-03 |
| Age <sup>a</sup>                 | 4.18E-10 | White <sup>a</sup>             | 1.25E-02 |
| Creatinine <sup>a</sup>          | 1.41E-08 | Black <sup>a</sup>             | 1.64E-02 |
| White blood cell <sup>a</sup>    | 4.69E-08 | Hypercholesterolemia           | 5.36E-02 |
| Bicarbonate <sup>a</sup>         | 6.81E-08 | Body mass index                | 5.38E-02 |
| Blood urea nitrogen <sup>a</sup> | 2.81E-07 | Albumin                        | 6.44E-02 |
| Black <sup>a</sup>               | 2.71E-05 | Blood urea nitrogen            | 7.02E-02 |
| Hispanic <sup>a</sup>            | 4.35E-03 | Diastolic blood pressure       | 8.40E-02 |
| Hypertension <sup>a</sup>        | 5.35E-03 | Bicarbonate                    | 8.98E-02 |
| Asian                            | 5.30E-02 | Hypertension                   | 1.37E-01 |
| Body mass index                  | 6.62E-02 | Platelet                       | 1.46E-01 |
| Systolic blood pressure          | 1.01E-01 | Asian                          | 1.63E-01 |
| Hypercholesterolemia             | 2.13E-01 | Other race                     | 1.84E-01 |
| Other race                       | 2.25E-01 | Heart rate                     | 1.94E-01 |
| Diastolic blood pressure         | 3.14E-01 | Systolic blood pressure        | 2.21E-01 |
| White                            | 4.28E-01 | Age                            | 2.29E-01 |
| Diabetes mellitus                | 4.30E-01 | Hemoglobin                     | 3.50E-01 |

Covariates are listed based on the statistical significance.

<sup>a</sup> Significant covariates ( $P < .05$ ).

Matsuo et al. Survival outcome prediction in cervical cancer. Am J Obstet Gynecol 2019.

SUPPLEMENTAL TABLE 3

## Survival predictors in deep-learning model (features set 2)

| Progression-free survival               |          | Overall survival              |          |
|-----------------------------------------|----------|-------------------------------|----------|
| Features                                | Pvalue   | Features                      | Pvalue   |
| Hemoglobin <sup>a</sup>                 | 2.15E-38 | Albumin <sup>a</sup>          | 3.37E-06 |
| Albumin <sup>a</sup>                    | 3.87E-38 | Bicarbonate <sup>a</sup>      | 1.59E-05 |
| Sage IVB <sup>a</sup>                   | 1.53E-37 | Hispanic <sup>a</sup>         | 1.69E-03 |
| Stage IIIB <sup>a</sup>                 | 7.00E-30 | Stage IIA <sup>a</sup>        | 5.83E-03 |
| Stage IB1 <sup>a</sup>                  | 7.62E-30 | Body mass index <sup>a</sup>  | 6.10E-03 |
| Stage IA1 <sup>a</sup>                  | 4.75E-27 | Stage IA1 <sup>a</sup>        | 2.50E-02 |
| Heart rate <sup>a</sup>                 | 8.12E-19 | White blood cell <sup>a</sup> | 4.52E-02 |
| Platelet <sup>a</sup>                   | 4.00E-15 | Diastolic blood pressure      | 5.68E-02 |
| Creatinine <sup>a</sup>                 | 3.06E-08 | Hemoglobin                    | 6.10E-02 |
| White blood cell <sup>a</sup>           | 4.21E-08 | White                         | 6.18E-02 |
| Blood urea nitrogen <sup>a</sup>        | 1.10E-07 | Diabetes mellitus             | 6.64E-02 |
| Age <sup>a</sup>                        | 1.02E-06 | Heart rate                    | 7.42E-02 |
| Bicarbonate <sup>a</sup>                | 1.39E-05 | Black                         | 8.59E-02 |
| Stage IVA <sup>a</sup>                  | 8.64E-05 | Asian                         | 9.46E-02 |
| Black <sup>a</sup>                      | 8.58E-04 | Other histologic condition    | 1.11E-01 |
| Hypertension <sup>a</sup>               | 1.44E-03 | Creatinine                    | 1.17E-01 |
| Hispanic <sup>a</sup>                   | 1.51E-03 | Blood urea nitrogen           | 1.35E-01 |
| Stage IIB <sup>a</sup>                  | 6.82E-03 | Platelet                      | 1.63E-01 |
| Other histologic condition <sup>a</sup> | 9.65E-03 | Systolic blood pressure       | 1.66E-01 |
| Body mass index <sup>a</sup>            | 1.47E-02 | Hypertension                  | 1.66E-01 |
| Asian <sup>a</sup>                      | 2.10E-02 | Stage IIIA                    | 1.68E-01 |
| Adenocarcinoma <sup>a</sup>             | 3.56E-02 | Stage IIIB                    | 1.83E-01 |
| Stage IB2                               | 2.12E-01 | Stage IIB                     | 1.84E-01 |
| Systolic blood pressure                 | 2.27E-01 | Age                           | 1.91E-01 |
| Hypercholesterolemia                    | 3.08E-01 | Squamous                      | 1.99E-01 |
| Squamous                                | 3.19E-01 | Adenosquamous                 | 2.16E-01 |
| Diastolic blood pressure                | 3.65E-01 | Stage IB1                     | 2.24E-01 |
| Stage IIA                               | 4.58E-01 | Hypercholesterolemia          | 2.36E-01 |
| Diabetes mellitus                       | 4.78E-01 | Adenocarcinoma                | 2.54E-01 |
| White                                   | 4.84E-01 | Stage IVB                     | 3.28E-01 |
| Stage IIIA                              | 4.87E-01 | Stage IVA                     | 3.73E-01 |
| Adenosquamous                           | 5.88E-01 | Stage IB2                     | 3.95E-01 |

Covariates are listed based on the statistical significance.

<sup>a</sup> Significant covariates ( $P < .05$ ).

Matsuo et al. Survival outcome prediction in cervical cancer. Am J Obstet Gynecol 2019.

SUPPLEMENTAL TABLE 4

## Univariable analysis for survival outcome

| Features                             | Progression-free survival              |                             | Overall survival                       |                             |
|--------------------------------------|----------------------------------------|-----------------------------|----------------------------------------|-----------------------------|
|                                      | Hazard ratio (95% confidence interval) | <i>P</i> value <sup>a</sup> | Hazard ratio (95% confidence interval) | <i>P</i> value <sup>a</sup> |
| Age, y                               | 1.02 (1.01–1.03)                       | <.001                       | 1.02 (1.01–1.03)                       | .003                        |
| Ethnicity                            |                                        | .001                        |                                        | <.001                       |
| White                                | 1                                      |                             | 1                                      |                             |
| Black                                | 1.97 (1.05–3.67)                       |                             | 2.34 (1.16–4.70)                       |                             |
| Hispanic                             | 0.84 (0.52–1.37)                       |                             | 0.72 (0.40–1.28)                       |                             |
| Asian                                | 1.27 (0.72–2.23)                       |                             | 1.29 (0.67–2.49)                       |                             |
| Histologic condition                 |                                        | .043                        |                                        | .002                        |
| Squamous cell                        | 1                                      |                             | 1                                      |                             |
| Adenocarcinoma                       | 0.89 (0.63–1.26)                       |                             | 0.72 (0.46–1.11)                       |                             |
| Adenosquamous                        | 1.02 (0.54–1.93)                       |                             | 0.72 (0.29–1.75)                       |                             |
| Other                                | 2.23 (1.24–4.00)                       |                             | 2.80 (1.51–5.19)                       |                             |
| Stage                                |                                        | <.001                       |                                        | <.001                       |
| I                                    | 1                                      |                             | 1                                      |                             |
| II                                   | 3.25 (2.22–4.78)                       |                             | 3.98 (2.39–6.62)                       |                             |
| III                                  | 6.15 (4.27–8.87)                       |                             | 8.15 (5.06–13.1)                       |                             |
| IV                                   | 20.9 (14.0–31.1)                       |                             | 30.0 (18.2–49.4)                       |                             |
| Primary hysterectomy                 |                                        | <.001                       |                                        | <.001                       |
| No                                   | 1                                      |                             | 1                                      |                             |
| Yes                                  | 0.15 (0.10–0.25)                       |                             | 0.10 (0.05–0.19)                       |                             |
| Radiotherapy                         |                                        | .003                        |                                        |                             |
| No                                   | 1                                      |                             |                                        |                             |
| Yes                                  | 1.57 (1.17–2.11)                       |                             |                                        |                             |
| Primary chemotherapy                 |                                        | .001                        |                                        | <.001                       |
| No                                   | 1                                      |                             | 1                                      |                             |
| Yes                                  | 5.17 (3.82–7.00)                       |                             | 6.37 (4.53–8.95)                       |                             |
| Laboratory test                      |                                        |                             |                                        |                             |
| White blood cell, 10 <sup>9</sup> /L | 1.06 (1.03–1.10)                       | .001                        | 1.07 (1.03–1.11)                       | .001                        |
| Platelet, 10 <sup>9</sup> /L         | 1.003 (1.002–1.004)                    | <.001                       | 1.004 (1.003–1.005)                    | <.001                       |
| Hemoglobin, g/dL                     | 0.82 (0.78–0.86)                       | <.001                       | 0.81 (0.76–0.85)                       | <.001                       |
| Blood urea nitrogen, mg/dL           | 1.02 (1.01–1.03)                       | <.001                       | 1.02 (1.01–1.03)                       | <.001                       |
| Creatinine, mg/dL                    | 1.17 (1.11–1.24)                       | <.001                       | 1.18 (1.11–1.25)                       | <.001                       |
| Bicarbonate, mEq/L                   | 0.92 (0.88–0.95)                       | <.001                       | 0.89 (0.85–0.93)                       | <.001                       |
| Albumin, g/dL                        | 0.39 (0.31–0.48)                       | <.001                       | 0.30 (0.23–0.38)                       | <.001                       |
| Heart rate, beats/min                | 1.03 (1.02–1.04)                       | <.001                       | 1.03 (1.02–1.04)                       | <.001                       |

All the covariates that are shown in Table 1 were examined; the covariates with *P*<.05 are shown in this Table.

<sup>a</sup> Considered significant.

Matsuo et al. Survival outcome prediction in cervical cancer. *Am J Obstet Gynecol* 2019.
